# Supplementary material for: Ginkgolide B Regulates CDDP Chemoresistance in Oral Cancer via the Platelet-Activating Factor Receptor Pathway
Source: MDPI journal article supplement (doi:10.3390/cancers13246299), 2021-12-15

## Supplementary Materials

# Ginkgolide B Regulates CDDP Chemoresistance in Oral Cancer via the Platelet-Activating Factor Receptor Pathway

Kohei Kawasaki, Atsushi Kasamatsu, Toshiaki Ando, Tomoaki Saito, Takafumi Nobuchi, Ryunosuke Nozaki, Manabu Iyoda and Katsuhiko Uzawa

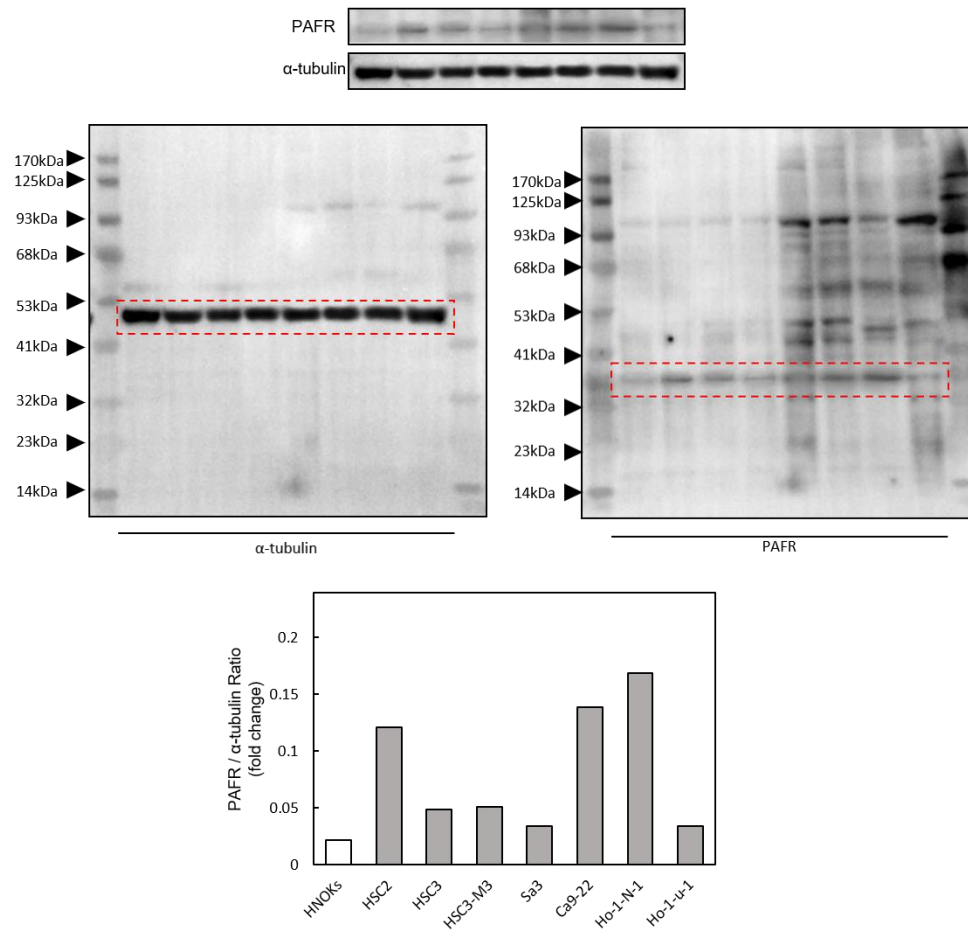

**Figure S1.** Full length blots of Figure 1B.

**Table S1.** Densitometry readings/intensity ratio of each band for blots of Figure 1B.

| Cell Line | PAFR         | $\alpha$ -tubulin | PAFR/ $\alpha$ -tubulin |
|-----------|--------------|-------------------|-------------------------|
| HNOKs     | 271,134.67   | 12,727,560.00     | 0.021302958             |
| HSC2      | 802,338.23   | 6,633,935.00      | 0.120944542             |
| HSC3      | 524,384.61   | 10,752,920.00     | 0.048766717             |
| HSC3-M3   | 441,746.72   | 8,643,179.00      | 0.051109287             |
| Sa3       | 296,266.51   | 8,658,495.00      | 0.03421686              |
| Ca9-22    | 1,178,130.69 | 8,473,819.00      | 0.139031845             |
| Ho-1-N-1  | 1,449,447.00 | 8,579,264.00      | 0.168947709             |
| Ho-1-u-1  | 282,764.59   | 8,408,593.00      | 0.03362805              |

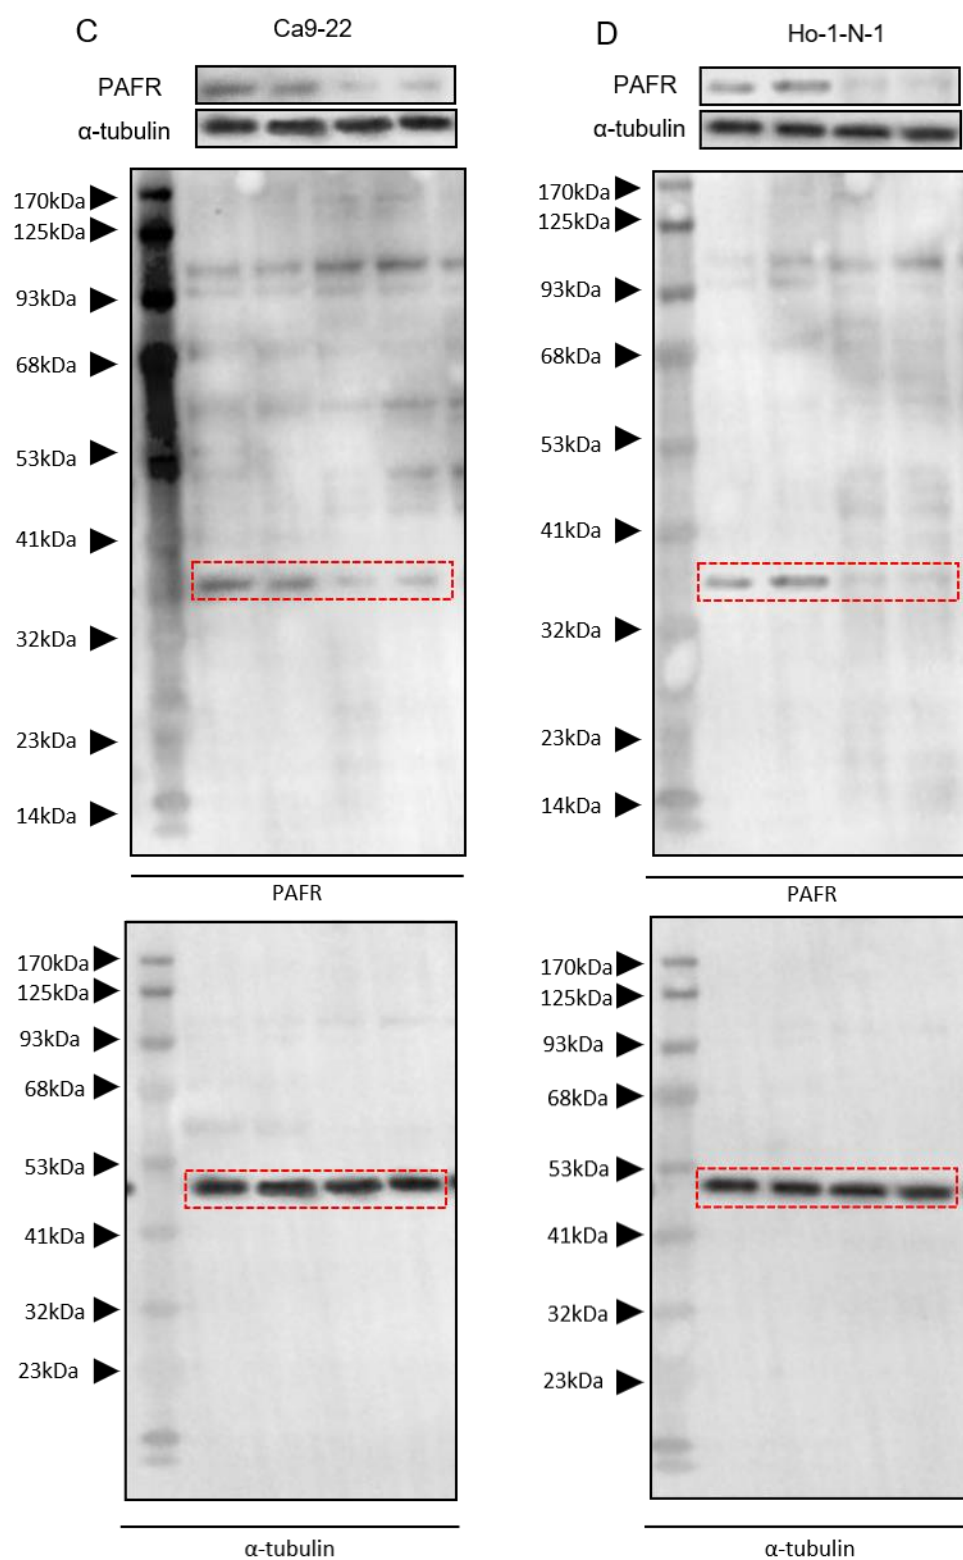

**Figure S2.** Full length blots of Figure 3C,D.

**Table S2.** Densitometry readings/intensity ratio of each band for blots of Figure 3C,D.

| <b>Cell Line</b> | <b>Treatment</b> | <b>PAFR</b>                             | <b><math>\alpha</math>-tubulin</b> |
|------------------|------------------|-----------------------------------------|------------------------------------|
| Ca9-22           | mock             | 545,059.15                              | 3,299,895.03                       |
|                  | control          | 546,936.03                              | 3,601,183.13                       |
|                  | siPAFR-1         | 150,095.59                              | 3,751,964.06                       |
|                  | siPAFR-2         | 299,206.89                              | 3,588,765.82                       |
|                  |                  | <b>PAFR</b>                             | <b><math>\alpha</math>-tubulin</b> |
| Ho-1-N-1         | mock             | 642,385.05                              | 3,741,251.51                       |
|                  | control          | 678,928.18                              | 4,160,239.00                       |
|                  | siPAFR-1         | 218,990.13                              | 3,851,011.70                       |
|                  | siPAFR-2         | 251,711.88                              | 3,876,946.08                       |
|                  |                  | <b>PAFR/<math>\alpha</math>-tubulin</b> |                                    |
| Ca9-22           | mock             | 0.165174693                             |                                    |
|                  | control          | 0.151876761                             |                                    |
|                  | siPAFR-1         | 0.040004538                             |                                    |
|                  | siPAFR-2         | 0.0833732                               |                                    |
|                  |                  | <b>PAFR/<math>\alpha</math>-tubulin</b> |                                    |
| Ho-1-N-1         | mock             | 0.171703252                             |                                    |
|                  | control          | 0.163194514                             |                                    |
|                  | siPAFR-1         | 0.05686561                              |                                    |
|                  | siPAFR-2         | 0.064925298                             |                                    |

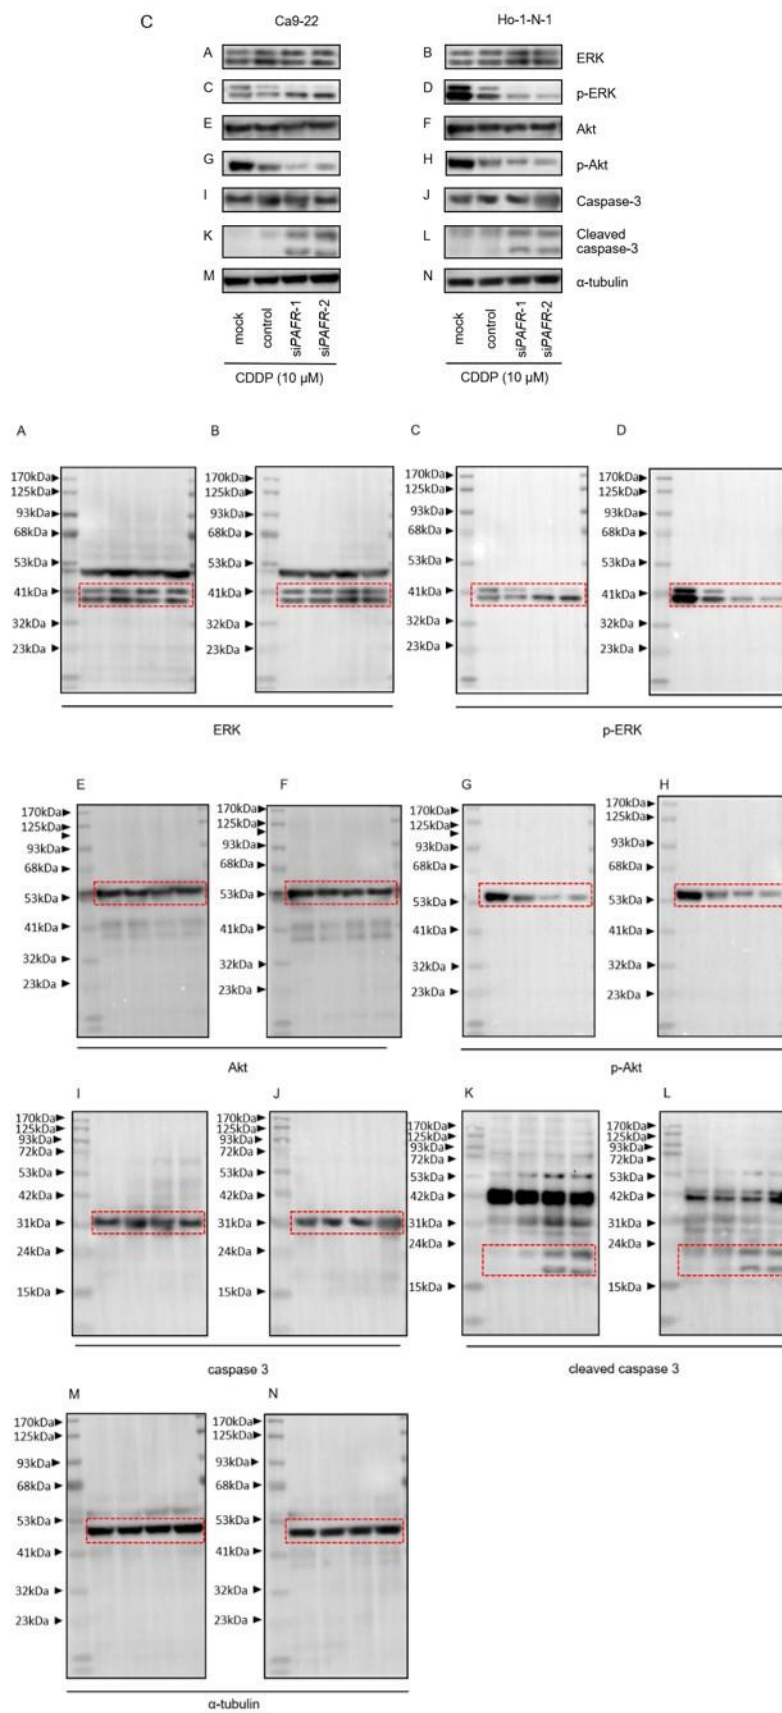

Figure S3. Full length blots of Figure 5C.

**Table S3.** Densitometry readings/intensity ratio of each band for blots of Figure 5C.

| Cell Line | Treatment | ERK                       | p-ERK                       | Akt                       | p-Akt                       | Caspase 3                       | Cleaved Caspase 3                       | $\alpha$ -tubulin |
|-----------|-----------|---------------------------|-----------------------------|---------------------------|-----------------------------|---------------------------------|-----------------------------------------|-------------------|
| Ca9-22    | mock      | 1,356,531.46              | 3,215,954.88                | 2,764,251.84              | 3,297,971.96                | 3,592,708.68                    | 61,272.72                               | 2,566,574.30      |
|           | control   | 2,309,543.50              | 2,484,591.27                | 2,900,993.82              | 2,406,840.00                | 4,544,902.74                    | 105,181.64                              | 2,597,377.21      |
|           | siPAFR-1  | 1,766,964.96              | 1,548,984.54                | 2,919,050.69              | 418,752.69                  | 4,158,652.76                    | 337,876.54                              | 2,081,260.50      |
|           | siPAFR-2  | 1,637,630.22              | 1,889,635.51                | 2,512,724.06              | 1,241,790.82                | 4,444,442.33                    | 461,972.14                              | 3,030,881.43      |
|           |           | ERK                       | p-ERK                       | Akt                       | p-Akt                       | Caspase 3                       | Cleaved Caspase 3                       | $\alpha$ -tubulin |
| Ho-1-N1   | mock      | 2,234,600.88              | 10,149,673.75               | 3,301,442.54              | 6,006,537.31                | 5,295,274.43                    | 71,106.42                               | 2,996,538.37      |
|           | control   | 1,794,416.00              | 2,271,717.06                | 3,678,785.98              | 2,085,885.73                | 4,987,485.44                    | 87,045.59                               | 2,529,115.75      |
|           | siPAFR-1  | 2,893,110.21              | 1,362,577.56                | 3,500,105.76              | 632,686.00                  | 3,035,688.51                    | 282,056.80                              | 2,400,054.21      |
|           | siPAFR-2  | 1,643,520.63              | 1,046,864.88                | 3,703,172.00              | 47,883.70                   | 4,441,634.19                    | 322,254.24                              | 2,987,692.00      |
|           |           | ERK/<br>$\alpha$ -tubulin | p-ERK/<br>$\alpha$ -tubulin | Akt/<br>$\alpha$ -tubulin | p-Akt/<br>$\alpha$ -tubulin | Caspase 3/<br>$\alpha$ -tubulin | Cleaved Caspase 3/<br>$\alpha$ -tubulin |                   |
| Ca9-22    | mock      | 0.528537771               | 1.253014526                 | 1.077019995               | 1.284970383                 | 1.399807003                     | 0.023873347                             |                   |
|           | control   | 0.889182939               | 0.956576989                 | 1.116893537               | 0.926642457                 | 1.749804658                     | 0.040495327                             |                   |
|           | siPAFR-1  | 0.84898789                | 0.744253081                 | 1.402539802               | 0.201201479                 | 1.998141396                     | 0.162342263                             |                   |
|           | siPAFR-2  | 0.540314842               | 0.623460717                 | 0.829040699               | 0.409712768                 | 1.466386077                     | 0.152421713                             |                   |
|           |           | ERK/<br>$\alpha$ -tubulin | p-ERK/<br>$\alpha$ -tubulin | Akt/<br>$\alpha$ -tubulin | p-Akt/<br>$\alpha$ -tubulin | Caspase 3/<br>$\alpha$ -tubulin | Cleaved Caspase 3/<br>$\alpha$ -tubulin |                   |
| Ho-1-N-1  | mock      | 0.745727437               | 3.387132917                 | 1.101752133               | 2.00449204                  | 1.767130527                     | 0.023729521                             |                   |
|           | control   | 0.709503312               | 0.898225817                 | 1.454573987               | 0.824749018                 | 1.972027354                     | 0.034417401                             |                   |
|           | siPAFR-1  | 1.20543536                | 0.567727826                 | 1.45834446                | 0.263613212                 | 1.264841643                     | 0.117521012                             |                   |
|           | siPAFR-2  | 0.550097075               | 0.350392504                 | 1.239475823               | 0.016026987                 | 1.486643935                     | 0.107860596                             |                   |

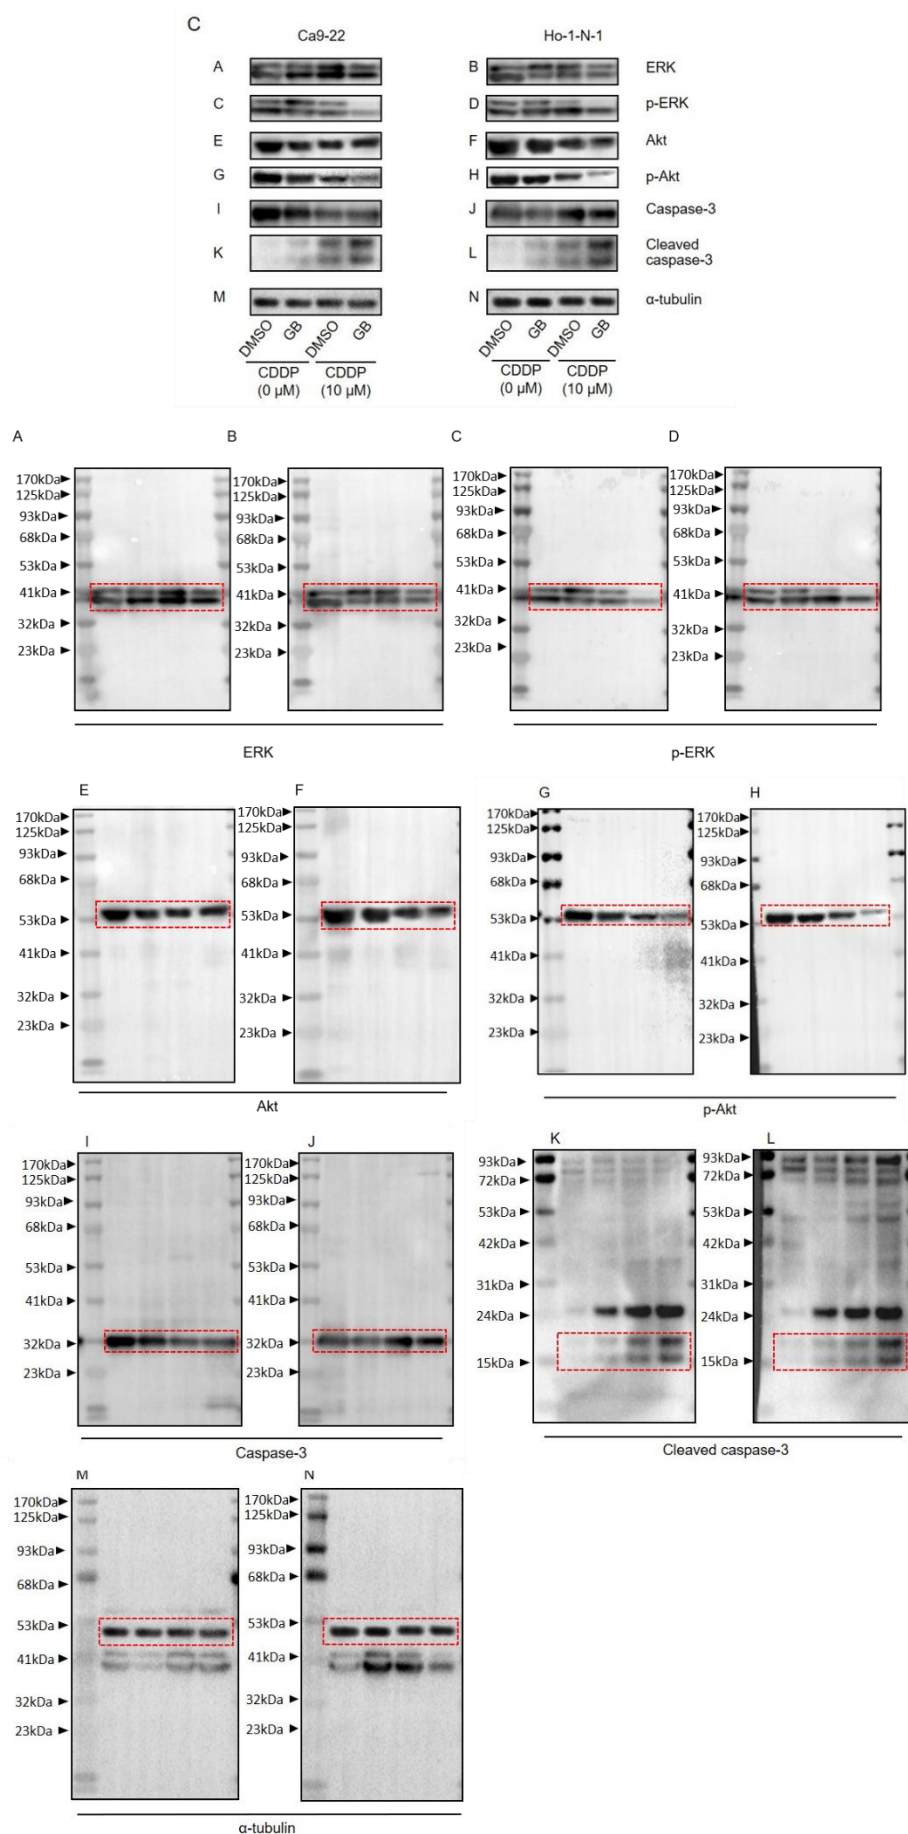

Figure S4. Full length blots of Figure 8C.

**Table S4.** Densitometry readings/intensity ratio of each band for blots of Figure 8C.

| Cell Line | Treatment | ERK                       | p-ERK                       | Akt                       | p-Akt                       | Caspase 3                       | Cleaved Caspase 3                       | $\alpha$ -tubulin |
|-----------|-----------|---------------------------|-----------------------------|---------------------------|-----------------------------|---------------------------------|-----------------------------------------|-------------------|
| Ca9-22    | DMSO      | 2,881,850.75              | 5,823,743.33                | 1,145,574.69              | 4,615,888.30                | 10,546,622.03                   | 3,058,261.06                            | 3,674,654.54      |
|           | GB        | 2,862,435.37              | 5,058,438.71                | 1,096,822.20              | 4,289,872.47                | 9,128,778.00                    | 4,276,263.37                            | 3,421,368.29      |
|           | CDDP      | 3,584,508.43              | 1,897,166.46                | 991,284.31                | 2,238,238.10                | 6,782,509.62                    | 8,043,499.69                            | 3,542,937.32      |
|           | GB+CDDP   | 2,778,551.69              | 597,242.70                  | 1,108,217.33              | 1,359,071.07                | 7,798,705.70                    | 16,284,861.19                           | 3,814,041.25      |
|           |           | ERK                       | p-ERK                       | Akt                       | p-Akt                       | Caspase 3                       | Cleaved Caspase 3                       | $\alpha$ -tubulin |
| Ho-1-N1   | DMSO      | 3,328,744.73              | 3,743,208.53                | 2,945,861.16              | 4,164,088.21                | 7,255,405.76                    | 3,044,909.50                            | 3,431,678.97      |
|           | GB        | 2,466,626.95              | 4,209,819.41                | 2,565,154.42              | 4,061,629.70                | 6,311,717.40                    | 4,314,978.71                            | 4,209,041.00      |
|           | CDDP      | 3,567,043.42              | 2,627,174.15                | 1,825,434.50              | 2,146,610.81                | 8,162,529.88                    | 8,358,677.27                            | 3,291,992.57      |
|           | GB+CDDP   | 3,223,696.17              | 920,484.53                  | 1,965,574.33              | 1,007,867.09                | 7,255,049.44                    | 16,807,416.81                           | 3,595,028.84      |
|           |           | ERK/<br>$\alpha$ -tubulin | p-ERK/<br>$\alpha$ -tubulin | Akt/<br>$\alpha$ -tubulin | p-Akt/<br>$\alpha$ -tubulin | Caspase 3/<br>$\alpha$ -tubulin | Cleaved Caspase 3/<br>$\alpha$ -tubulin |                   |
| Ca9-22    | DMSO      | 0.784250797               | 1.584841042                 | 0.311750309               | 1.256142026                 | 2.870098921                     | 0.832258098                             |                   |
|           | GB        | 0.836634682               | 1.478484127                 | 0.320579986               | 1.253846893                 | 2.668165841                     | 1.249869245                             |                   |
|           | CDDP      | 1.011733516               | 0.535478415                 | 0.279791659               | 0.631746429                 | 1.914374714                     | 2.270291082                             |                   |
|           | GB+CDDP   | 0.728505936               | 0.156590519                 | 0.290562492               | 0.356333587                 | 2.044735541                     | 4.269712867                             |                   |
|           |           | ERK/<br>$\alpha$ -tubulin | p-ERK/<br>$\alpha$ -tubulin | Akt/<br>$\alpha$ -tubulin | p-Akt/<br>$\alpha$ -tubulin | Caspase 3/<br>$\alpha$ -tubulin | Cleaved Caspase 3/<br>$\alpha$ -tubulin |                   |
| Ho-1-N-1  | DMSO      | 0.9700047                 | 1.090780508                 | 0.858431452               | 1.213425858                 | 2.11424373                      | 0.887294245                             |                   |
|           | GB        | 0.58603063                | 1.000184938                 | 0.609439162               | 0.964977295                 | 1.49956187                      | 1.025168916                             |                   |
|           | CDDP      | 1.08355148                | 0.798049842                 | 0.554507479               | 0.652070123                 | 2.47951042                      | 2.539093519                             |                   |
|           | GB+CDDP   | 0.896709404               | 0.256043712                 | 0.546747861               | 0.280350185                 | 2.01807823                      | 4.675182522                             |                   |

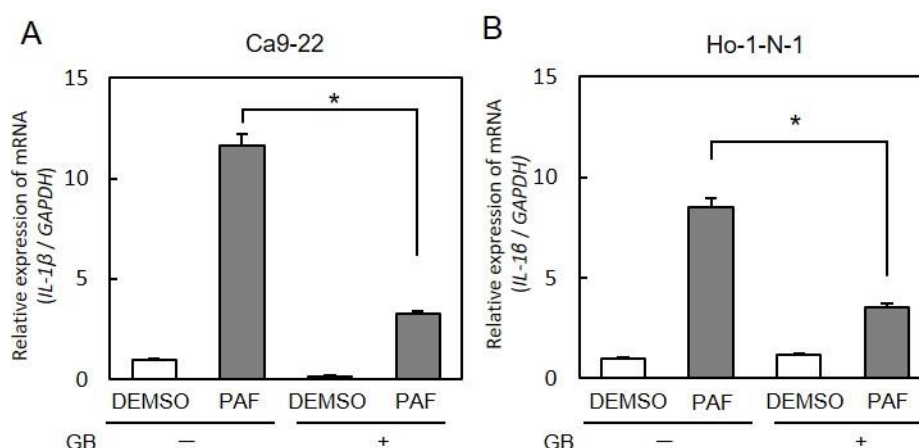

**Figure S5.** Confirmation of GB inhibition. To confirm the GB inhibitory effect, we investigated the expression level of IL-1 $\beta$ , an inflammatory cytokine induced by PAF. OSCC cells were treated with PAF (50 nM) and/or GB (200  $\mu$ M), and the expression level of IL-1 $\beta$  mRNA was quantified by qRT-PCR analysis. Expression of IL-1 $\beta$  mRNA induced by PAF was significantly down-regulated after treatment with GB compared to the cells treated with PAF alone (Ca9-22 (**A**) and Ho-1-N-1 (**B**); Unpaired *t*-test; \*, *p* < 0.001). GB, ginkgolide B; PAF, platelet-activating factor; OSCC, oral squamous cell carcinoma.

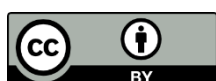

Supplement: s1 [file s1]
